# Supplementary material for: Local and Regional Enhancements of CH 4 , CO, and CO 2 Inferred from TCCON Column Measurements
Source: Copernicus journal article supplement (doi:10.5194/egusphere-2024-705), 2024-04-03
Supplement: Supplementary file 1 [file egusphere-2024-705-supplement.pdf]

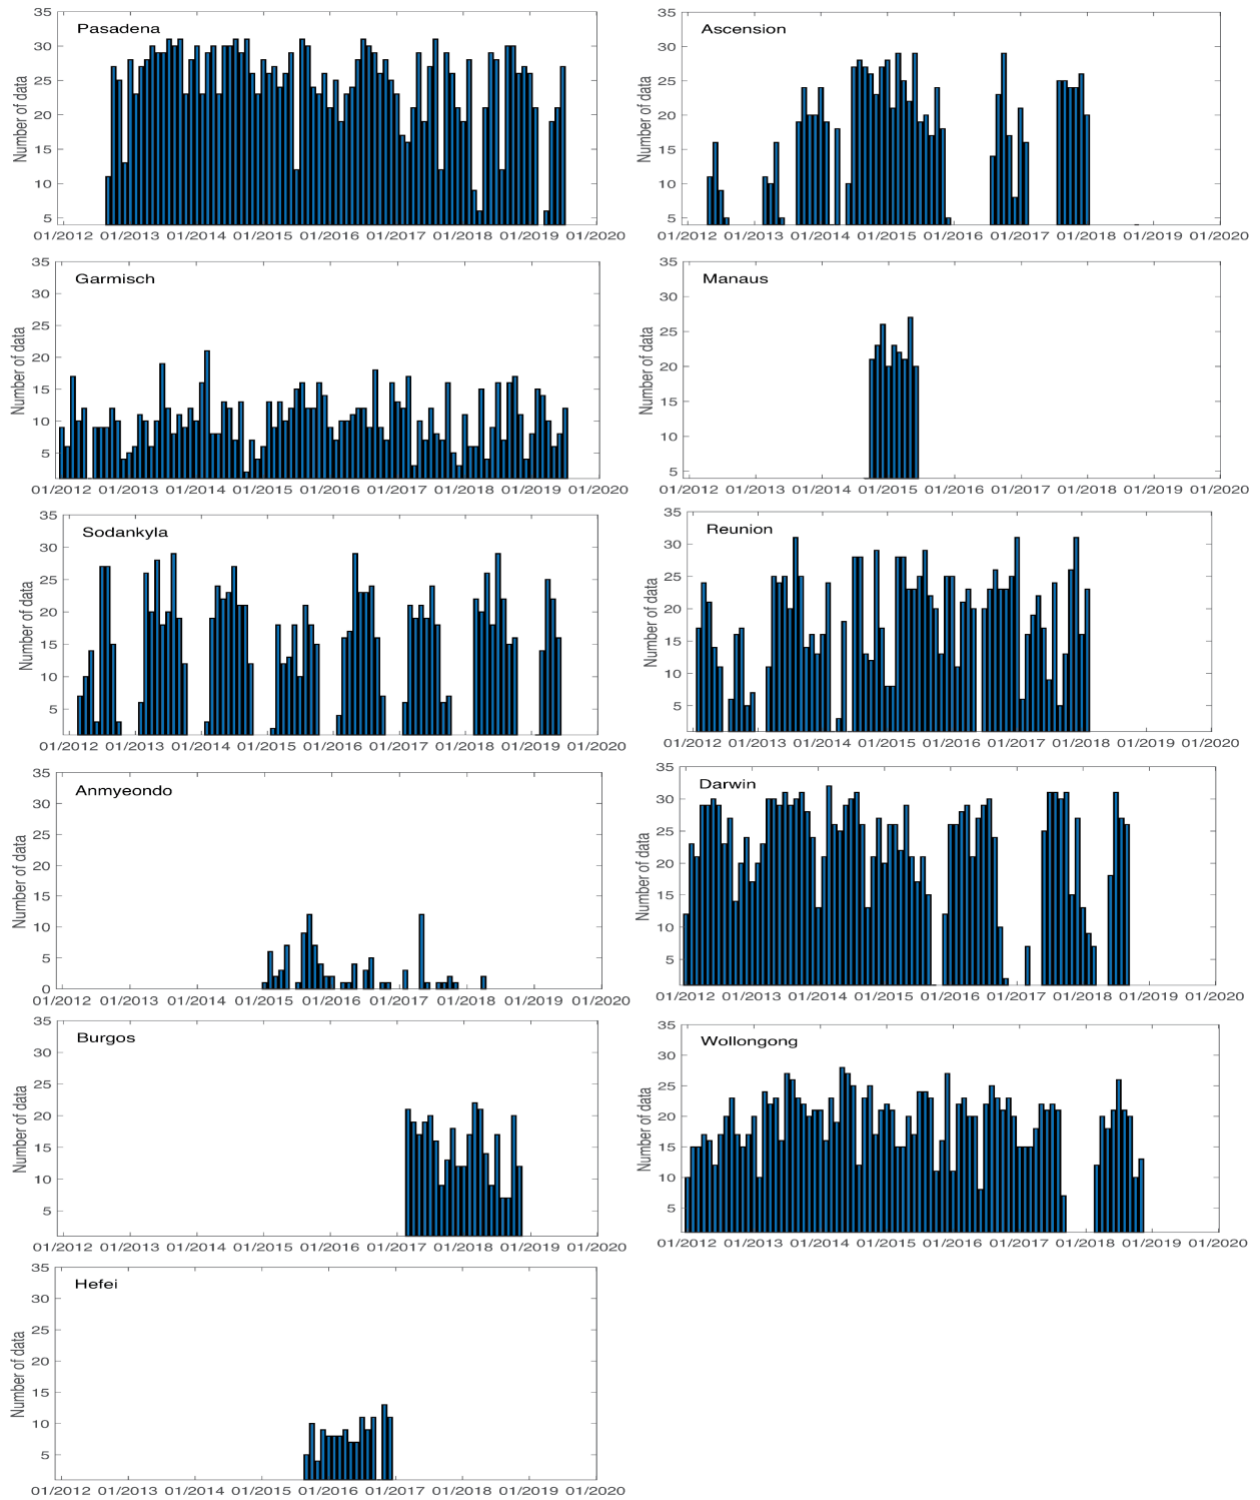

**Figure S1: Number of data in a month during 2012-2019 for Pasadena, Ascension, Garmisch, Manaus, Sodankyla, Reunion, Anmyeondo, Darwin, Burgos, Wollongong, and Hefei.**

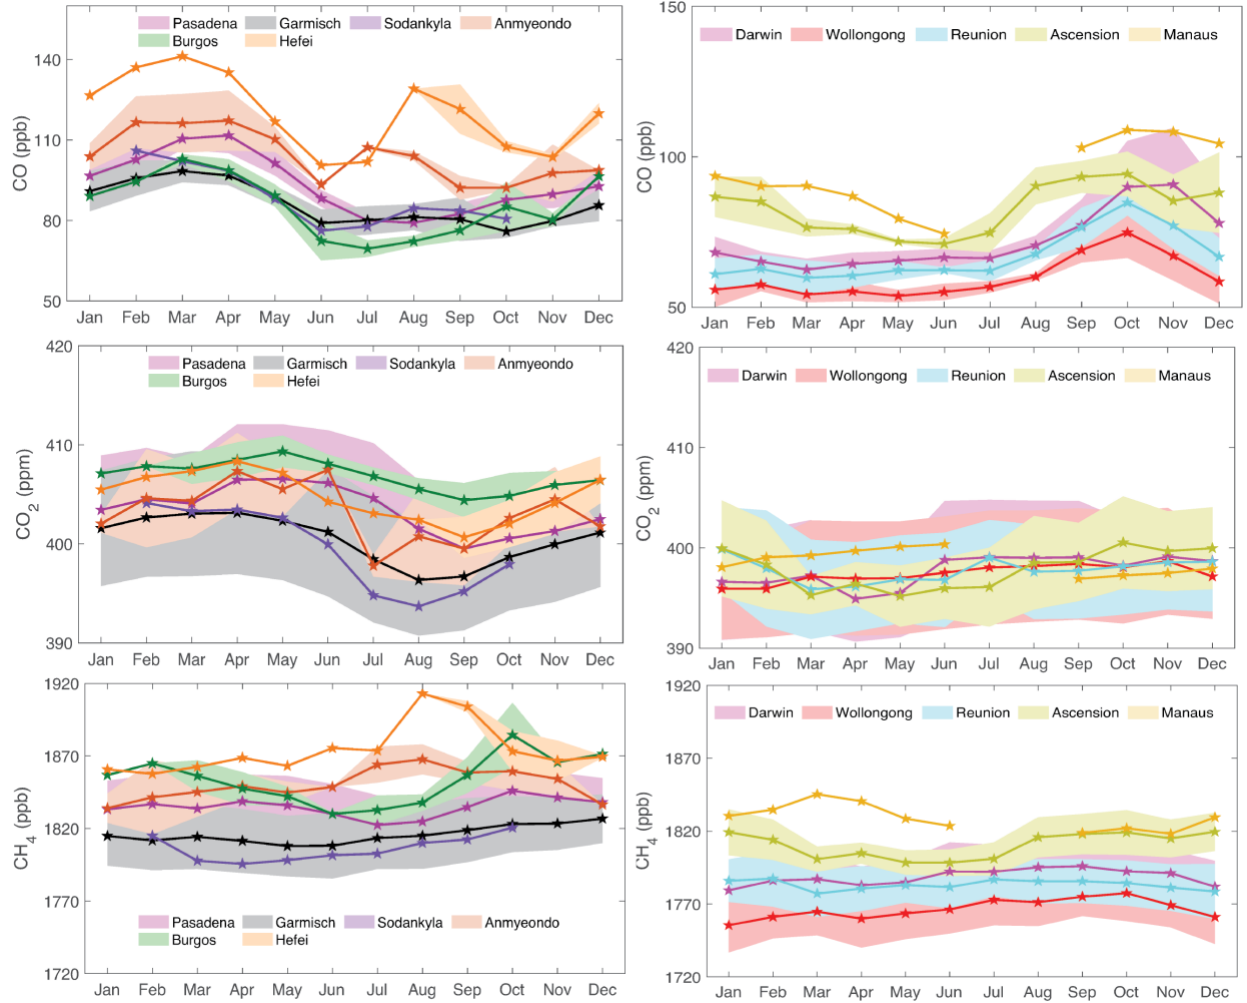

**Figure S2: Average monthly variation of CO, CO<sub>2</sub>, and CH<sub>4</sub> over the Northern Hemispheric locations (Pasadena, Garmisch, Sodankyla, Anmyeondo, Burgos, Hefei) and Southern Hemispheric locations (Darwin, Wollongong, Reunion, Ascension, Manaus) during 2012-2019. Shading corresponds to the standard deviation during each monthly averaging period.**

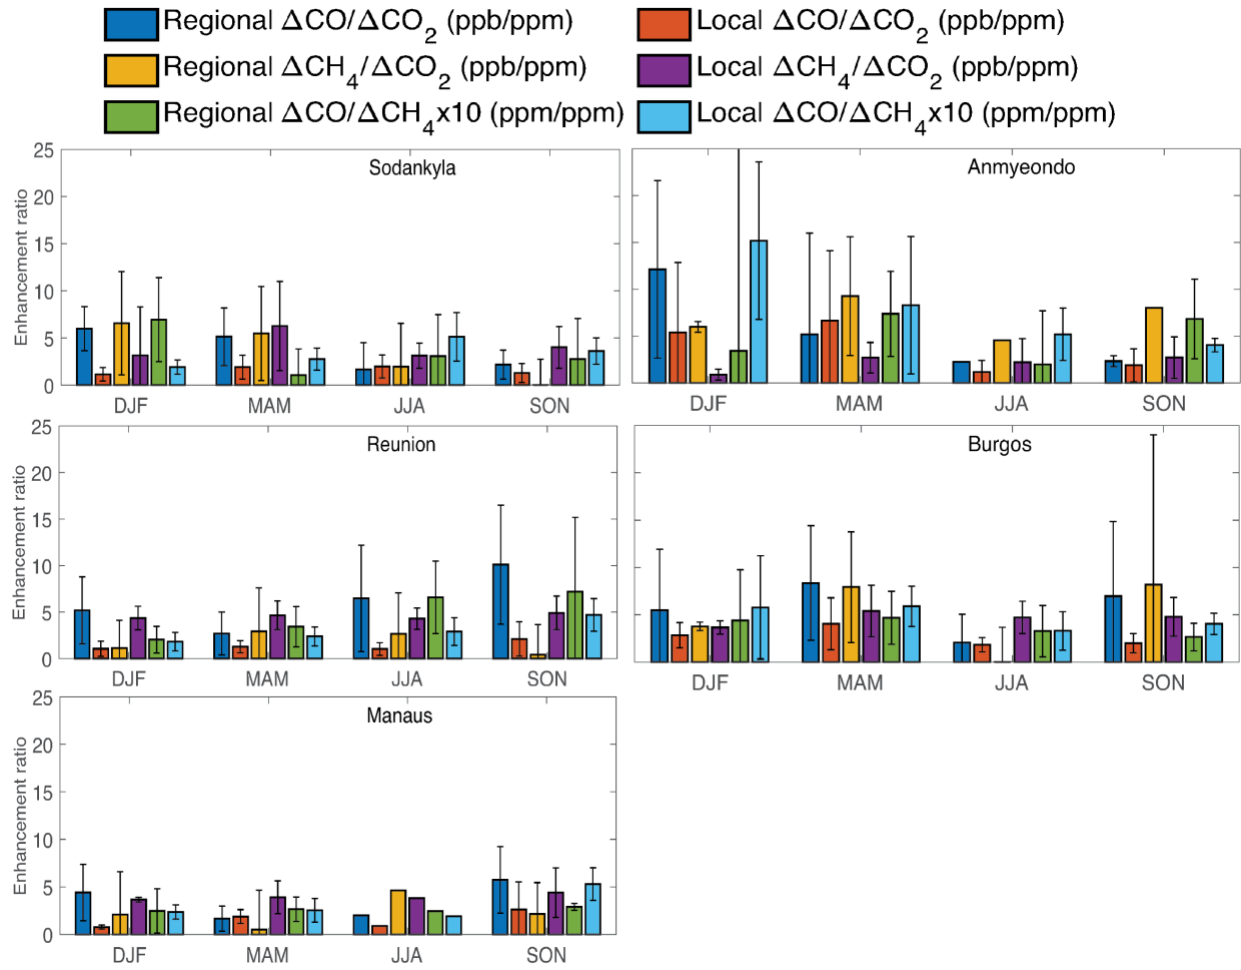

**Figure S3: Average seasonal variation of regional and local enhancement ratio of CO/CO<sub>2</sub>, CH<sub>4</sub>/CO<sub>2</sub> and CO/CH<sub>4</sub> over Sodankyla, Anmyeondo, Reunion, Burgos, and Manaus during 2012-2019.**

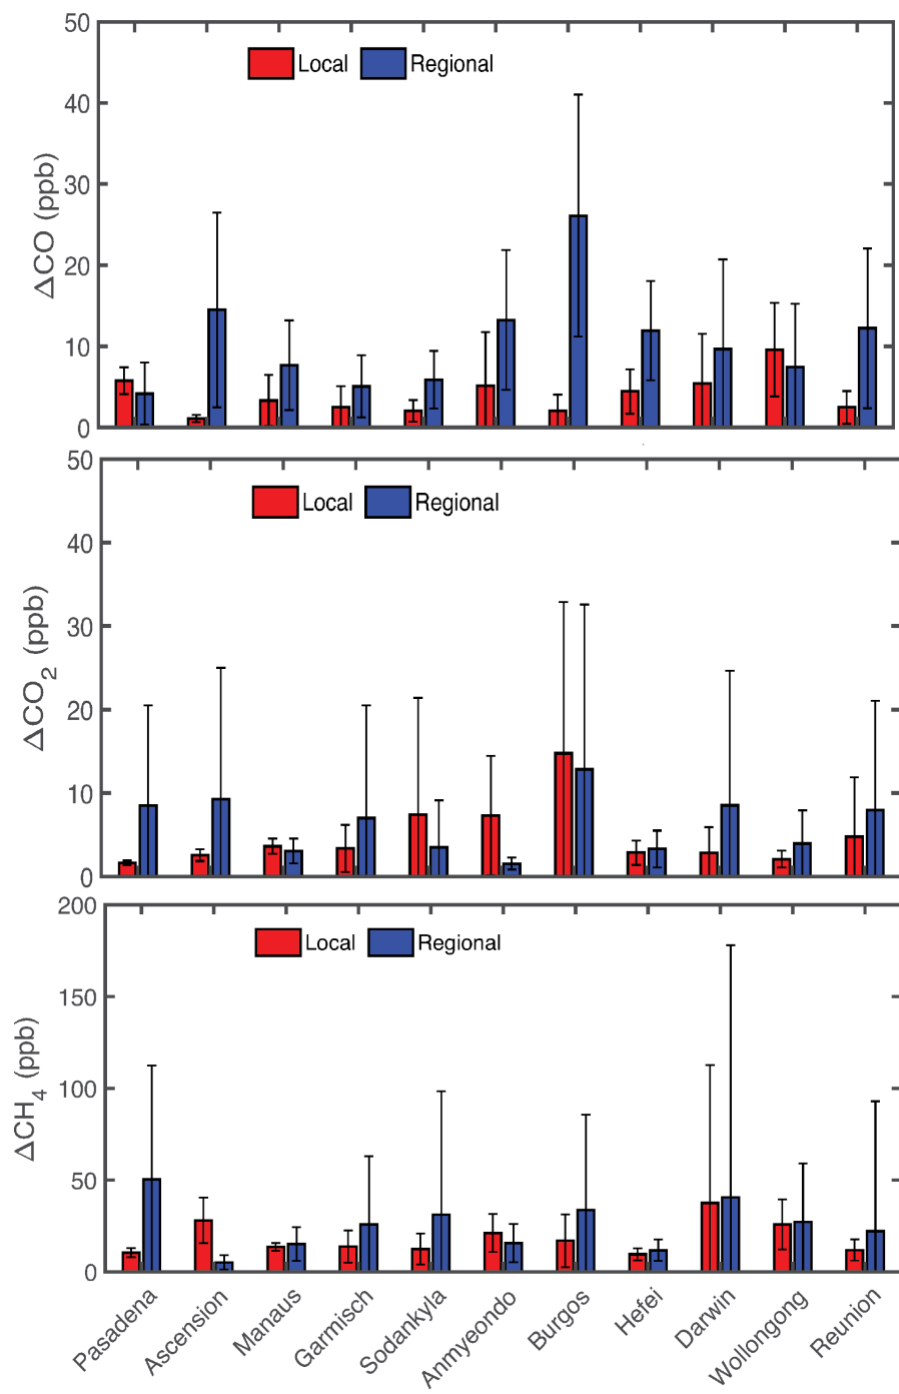

**Figure S4: The relative increase in CO, CO<sub>2</sub>, and CH<sub>4</sub> from the regional and local enhancements over Pasadena, Ascension, Manaus, Garmisch, Sodankyla, Anmyeondo, Burgos, Hefei, Darwin, Wollongong and Reunion during 2012-2019.**

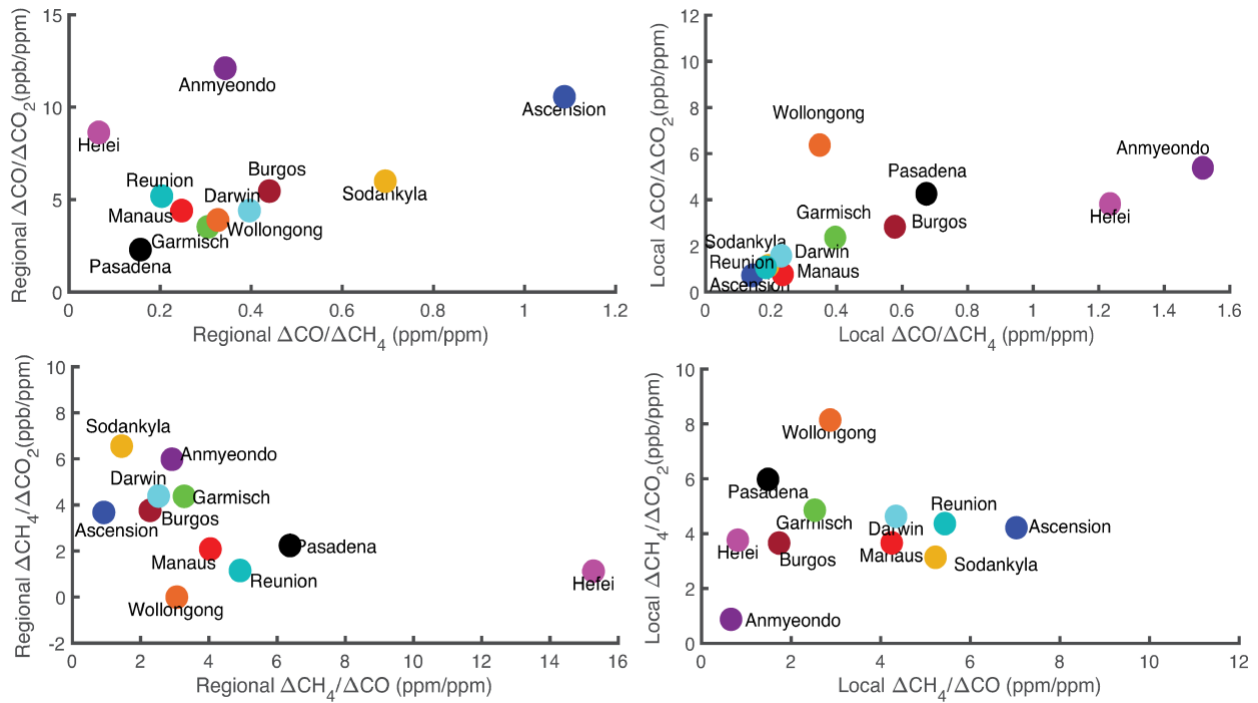

Figure S5: Scatter plot of average regional and local CO/CO<sub>2</sub> vs CO/CH<sub>4</sub> and CH<sub>4</sub>/CO<sub>2</sub> and CH<sub>4</sub>/CO during DJF months.

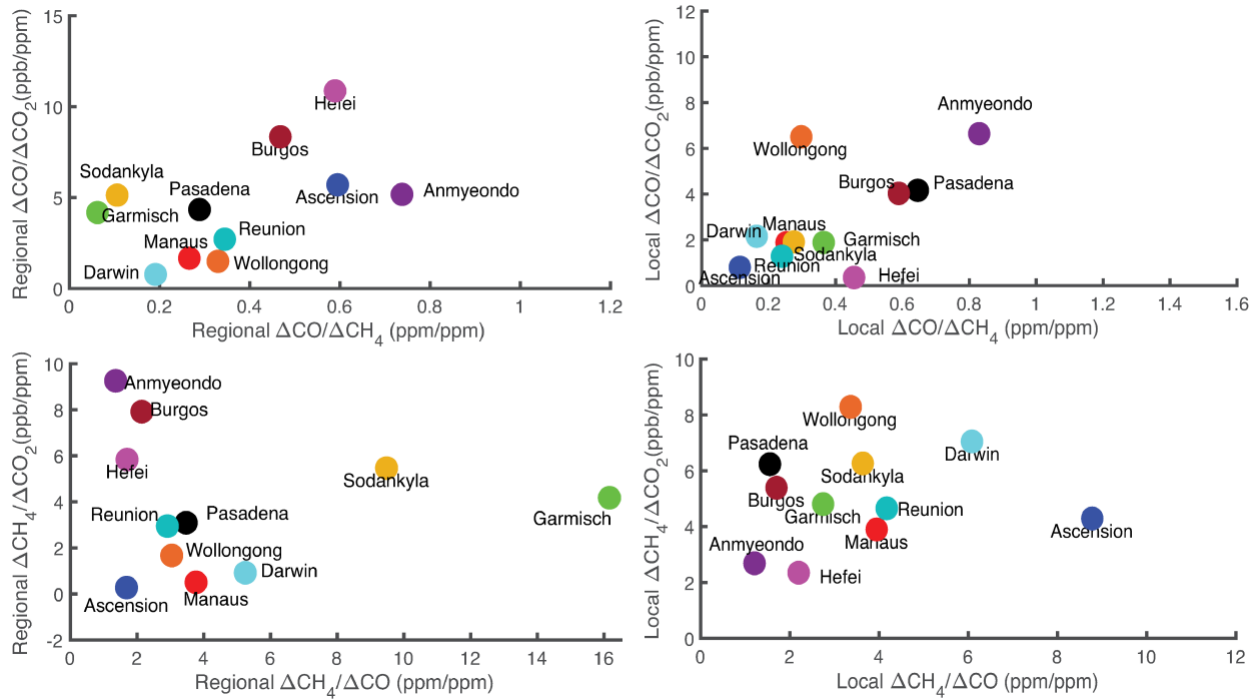

Figure S6: Scatter plot of average regional and local CO/CO<sub>2</sub> vs CO/CH<sub>4</sub> and CH<sub>4</sub>/CO<sub>2</sub> and CH<sub>4</sub>/CO during MAM months.

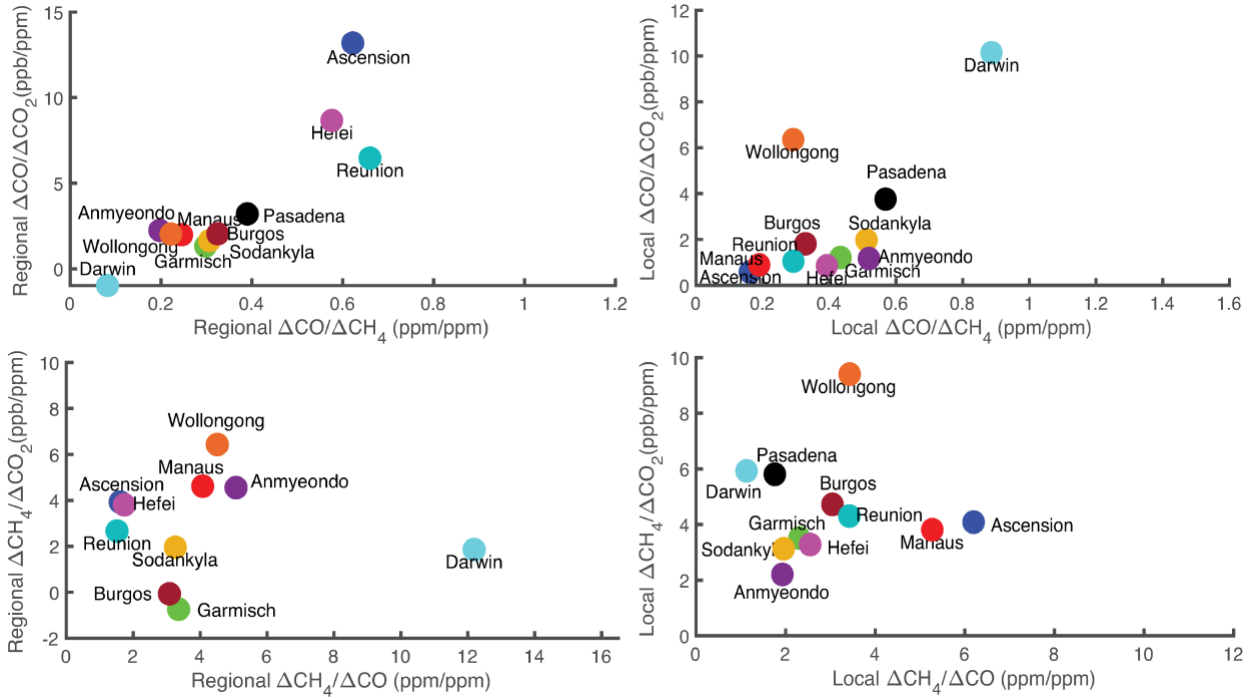

Figure S7: Scatter plot of average regional and local CO/CO<sub>2</sub> vs CO/CH<sub>4</sub> and CH<sub>4</sub>/CO<sub>2</sub> and CH<sub>4</sub>/CO during JJA months.

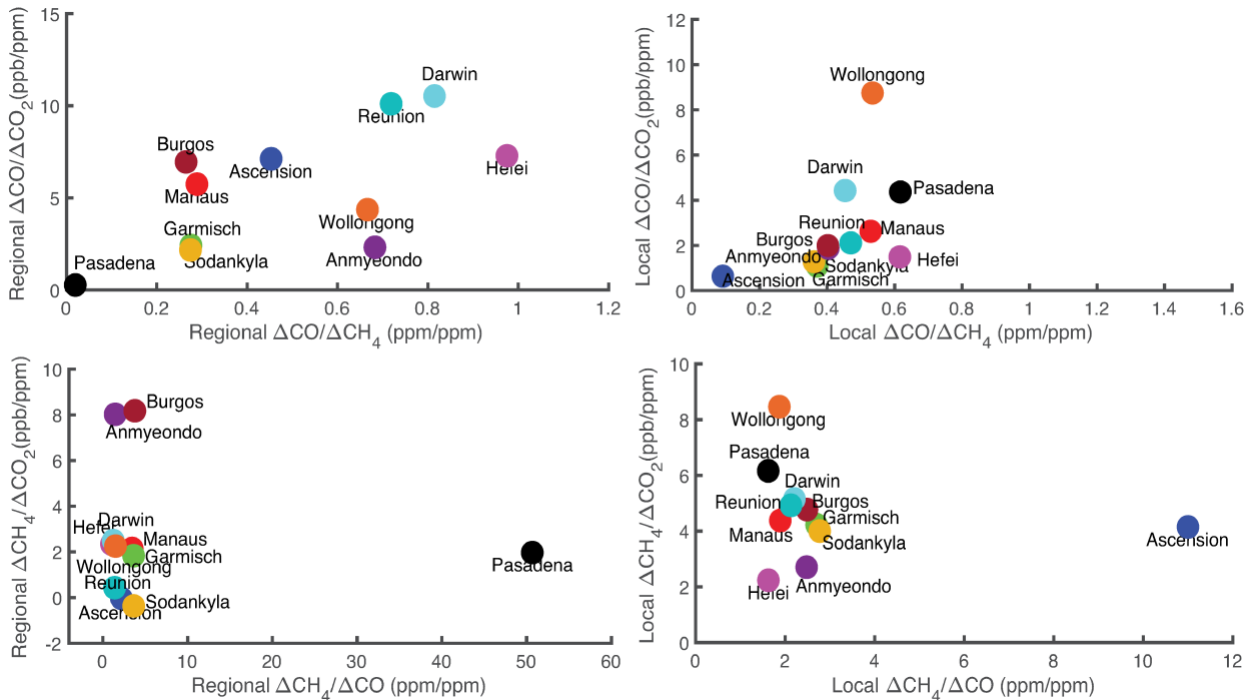

Figure S8: Scatter plot of average regional and local CO/CO<sub>2</sub> vs CO/CH<sub>4</sub> and CH<sub>4</sub>/CO<sub>2</sub> and CH<sub>4</sub>/CO during SON months.

**Table S1: Number of monthly data points used to generate Figure 5 and seasonal averages of regional enhancement ratios during 2012-2019.**

| Locations  | Regional enhancement ratio of CO/CO <sub>2</sub> |     |     |     | Regional enhancement ratio of CH <sub>4</sub> /CO <sub>2</sub> |     |     |     | Regional enhancement ratio of CO/CH <sub>4</sub> |     |     |     |
|------------|--------------------------------------------------|-----|-----|-----|----------------------------------------------------------------|-----|-----|-----|--------------------------------------------------|-----|-----|-----|
|            | DJF                                              | MAM | JJA | SON | DJF                                                            | MAM | JJA | SON | DJF                                              | MAM | JJA | SON |
| Pasadena   | 21                                               | 19  | 8   | 18  | 15                                                             | 13  | 0   | 9   | 21                                               | 17  | 18  | 20  |
| Ascension  | 12                                               | 7   | 5   | 15  | 12                                                             | 7   | 6   | 6   | 12                                               | 4   | 6   | 4   |
| Manaus     | 3                                                | 2   | 1   | 2   | 2                                                              | 3   | 1   | 2   | 3                                                | 3   | 1   | 2   |
| Garmisch   | 22                                               | 18  | 7   | 14  | 18                                                             | 17  | 3   | 14  | 21                                               | 21  | 19  | 19  |
| Sodankyla  | 4                                                | 24  | 12  | 4   | 4                                                              | 17  | 8   | 10  | 4                                                | 19  | 22  | 12  |
| Anmyeondo  | 2                                                | 4   | 1   | 2   | 2                                                              | 4   | 1   | 1   | 2                                                | 3   | 2   | 2   |
| Burgos     | 3                                                | 5   | 3   | 6   | 3                                                              | 5   | 3   | 5   | 3                                                | 6   | 6   | 5   |
| Hefei      | 4                                                | 3   | 3   | 5   | 4                                                              | 3   | 2   | 5   | 4                                                | 3   | 3   | 5   |
| Darwin     | 11                                               | 10  | 14  | 9   | 17                                                             | 13  | 19  | 12  | 10                                               | 14  | 16  | 13  |
| Wollongong | 16                                               | 20  | 20  | 19  | 17                                                             | 19  | 20  | 19  | 13                                               | 14  | 18  | 17  |
| Reunion    | 9                                                | 11  | 10  | 17  | 13                                                             | 14  | 13  | 14  | 10                                               | 12  | 8   | 9   |

**Table S2: Number of monthly data points used to generate the Figure 5 and seasonal average of local enhancement ratios during 2012-2019.**

| Locations  | Local enhancement ratio of CO/CO <sub>2</sub> |     |     |     | Local enhancement ratio of CH <sub>4</sub> /CO <sub>2</sub> |     |     |     | Local enhancement ratio of CO/CH <sub>4</sub> |     |     |     |
|------------|-----------------------------------------------|-----|-----|-----|-------------------------------------------------------------|-----|-----|-----|-----------------------------------------------|-----|-----|-----|
|            | DJF                                           | MAM | JJA | SON | DJF                                                         | MAM | JJA | SON | DJF                                           | MAM | JJA | SON |
| Pasadena   | 21                                            | 20  | 19  | 21  | 17                                                          | 16  | 10  | 19  | 21                                            | 19  | 18  | 21  |
| Ascension  | 12                                            | 7   | 10  | 15  | 12                                                          | 8   | 12  | 16  | 12                                            | 7   | 10  | 13  |
| Manaus     | 3                                             | 3   | 1   | 2   | 3                                                           | 3   | 1   | 2   | 3                                             | 3   | 1   | 2   |
| Garmisch   | 22                                            | 21  | 20  | 18  | 19                                                          | 23  | 20  | 18  | 22                                            | 23  | 22  | 19  |
| Sodankyla  | 4                                             | 24  | 22  | 14  | 4                                                           | 24  | 22  | 13  | 4                                             | 24  | 22  | 14  |
| Anmyeondo  | 3                                             | 4   | 3   | 3   | 3                                                           | 5   | 3   | 3   | 5                                             | 5   | 5   | 2   |
| Burgos     | 3                                             | 5   | 3   | 6   | 3                                                           | 6   | 6   | 6   | 3                                             | 6   | 6   | 5   |
| Hefei      | 4                                             | 3   | 3   | 6   | 4                                                           | 3   | 3   | 6   | 4                                             | 3   | 3   | 5   |
| Darwin     | 17                                            | 16  | 20  | 15  | 17                                                          | 17  | 21  | 18  | 15                                            | 15  | 16  | 14  |
| Wollongong | 16                                            | 20  | 20  | 19  | 17                                                          | 20  | 20  | 19  | 13                                            | 14  | 19  | 17  |
| Reunion    | 17                                            | 16  | 12  | 17  | 17                                                          | 17  | 15  | 18  | 10                                            | 12  | 8   | 9   |
